# Supplementary material for: Genome-Wide Identification and Expression Analysis of SWEET Family Genes in Sweet Potato and Its Two Diploid Relatives
Source: MDPI journal article supplement (doi:10.3390/ijms232415848), 2022-12-13
Supplement: s1 [file s1]

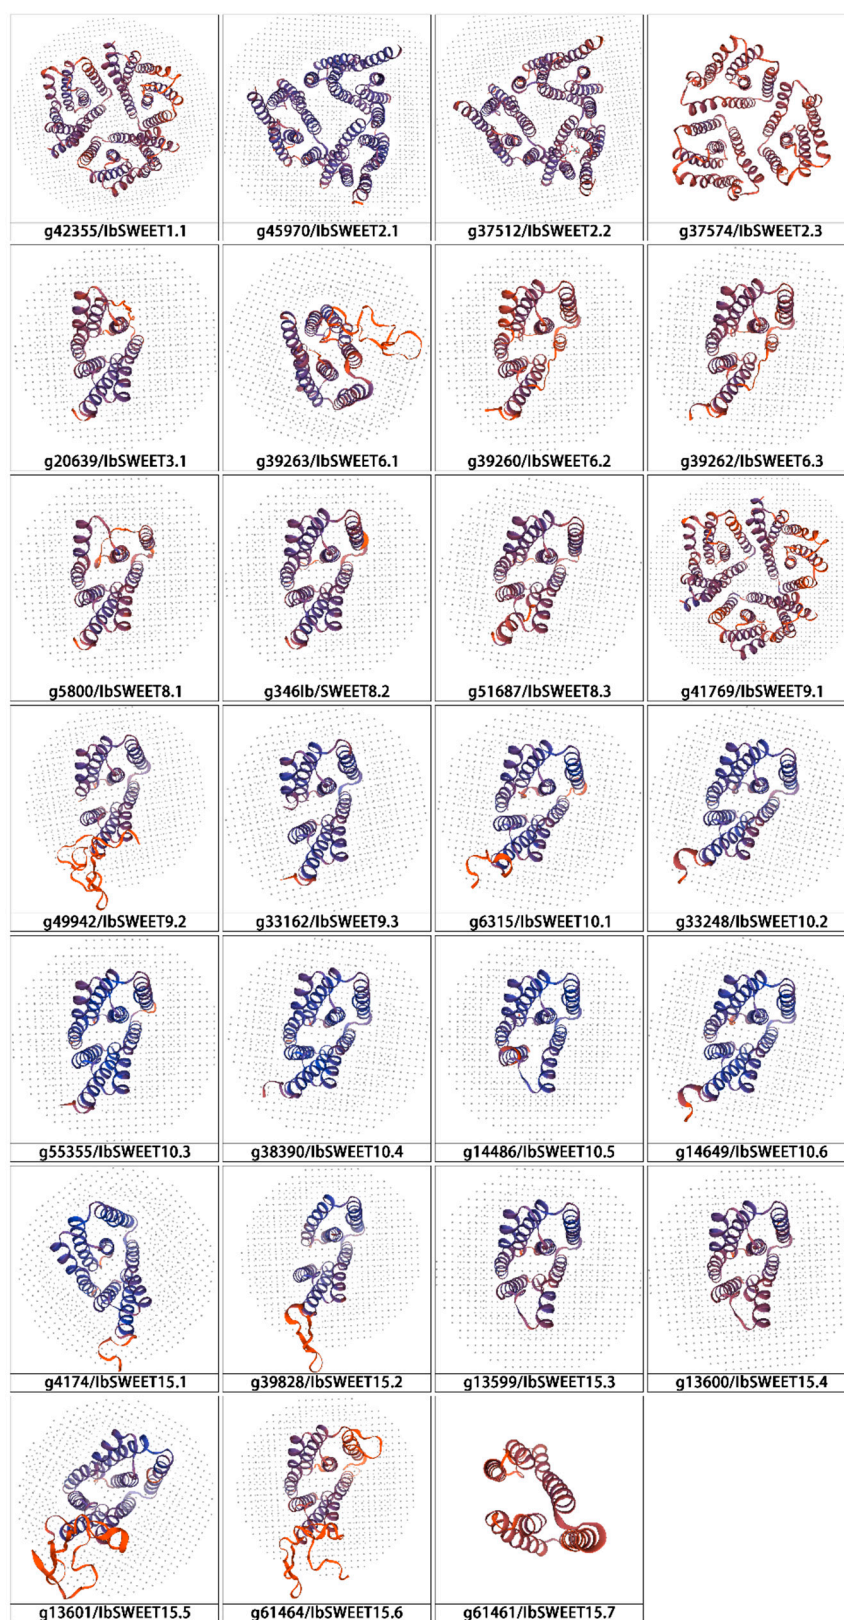

**Figure S1.** The three-dimensional structural models of IbSWEETs in *I. batatas*

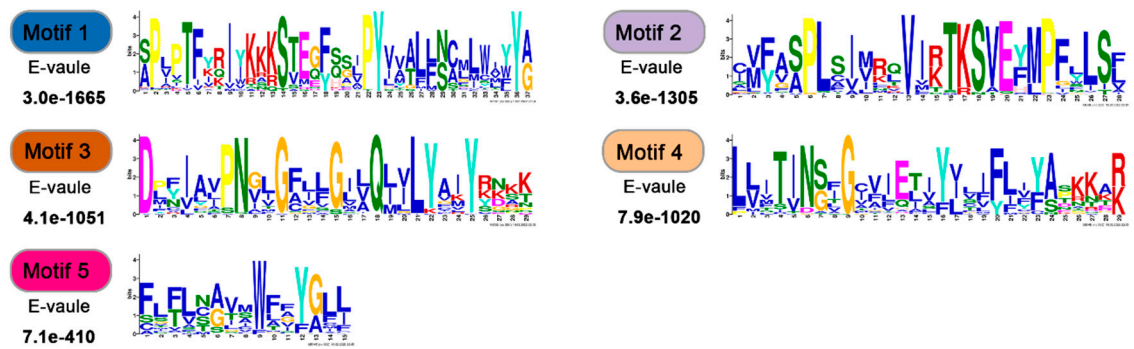

**Figure S2.** Conserved motifs analysis of IbSWEETs in *I. batatas*.

The Gene expression patterns of ItfSWEETs in response to different phytohormones;

The Gene expression patterns of ItbSWEETs in response to different phytohormones

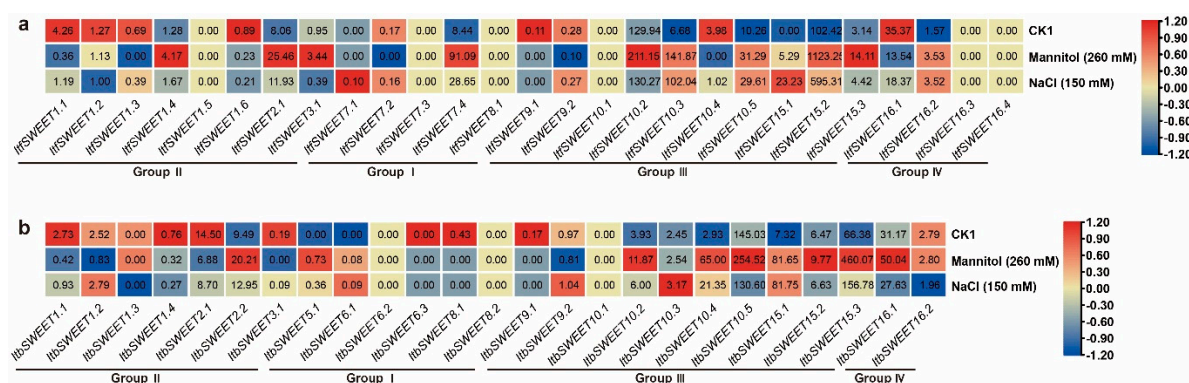

**Figure S3.** Gene expression patterns of SWEETs in response to different abiotic stress (Mannitol and NaCl) in *I. trifida* and *I. triloba* as determined by RNA-seq. Log<sub>2</sub> (FPKM+1) was shown in the boxes.

**Tabel S1.** Identification of SWEET family genes in *I. batatas*, *I. trifida*, and *I. triloba*.

| <i>Arabidopsis</i>                                                                                                                                                   | Homologous gene in<br><i>I. batatas</i> / <i>I. trifida</i> / <i>I. triloba</i> | Gene ID               | Gene name          | Chromosome<br>localization     |
|----------------------------------------------------------------------------------------------------------------------------------------------------------------------|---------------------------------------------------------------------------------|-----------------------|--------------------|--------------------------------|
| Group I :<br><i>AT3G28007.1/AtSWEET4</i><br><i>AT5G62850.1/AtSWEET5</i><br><i>AT1G66770.1/AtSWEET6</i><br><i>AT4G10850.1/AtSWEET7</i><br><i>AT5G40260.1/AtSWEET8</i> | <i>I. batatas</i>                                                               | <i>g39263</i>         | <i>IbSWEET6.1</i>  | <i>LG10:7838441-7841375</i>    |
|                                                                                                                                                                      |                                                                                 | <i>g39260</i>         | <i>IbSWEET6.2</i>  | <i>LG10:7816324-7818425</i>    |
|                                                                                                                                                                      |                                                                                 | <i>g39262</i>         | <i>IbSWEET6.3</i>  | <i>LG10:7830865-7833765</i>    |
|                                                                                                                                                                      |                                                                                 | <i>g5800</i>          | <i>IbSWEET8.1</i>  | <i>LG2:10784966-10786018</i>   |
|                                                                                                                                                                      |                                                                                 | <i>g346</i>           | <i>IbSWEET8.2</i>  | <i>LG1:1808926-1810903</i>     |
|                                                                                                                                                                      |                                                                                 | <i>g51687</i>         | <i>IbSWEET8.3</i>  | <i>LG13:3782061-3784597</i>    |
|                                                                                                                                                                      | <i>I. trifida</i>                                                               | <i>itf12g17160.t1</i> | <i>ItfSWEET7.1</i> | <i>Chr12:16815989-16818214</i> |
|                                                                                                                                                                      |                                                                                 | <i>itf08g07870.t1</i> | <i>ItfSWEET7.2</i> | <i>Chr08:5841213-5846012</i>   |
|                                                                                                                                                                      |                                                                                 | <i>itf08g07860.t1</i> | <i>ItfSWEET7.3</i> | <i>Chr08:5831106-5834414</i>   |
|                                                                                                                                                                      |                                                                                 | <i>itf08g07850.t2</i> | <i>ItfSWEET7.4</i> | <i>Chr08:5814193-5817068</i>   |
|                                                                                                                                                                      |                                                                                 | <i>itf05g24560.t1</i> | <i>ItfSWEET8.1</i> | <i>Chr05:24311908-24313582</i> |
|                                                                                                                                                                      | <i>I. triloba</i>                                                               | <i>itb02g13210.t1</i> | <i>ItbSWEET5.1</i> | <i>Chr02:9244237-9246292</i>   |
|                                                                                                                                                                      |                                                                                 | <i>itb12g17890.t1</i> | <i>ItbSWEET6.1</i> | <i>Chr12:20145343-20147563</i> |
|                                                                                                                                                                      |                                                                                 | <i>itb08g08270.t1</i> | <i>ItbSWEET6.2</i> | <i>Chr08:7215664-7220968</i>   |
|                                                                                                                                                                      |                                                                                 | <i>itb08g08260.t1</i> | <i>ItbSWEET6.3</i> | <i>Chr08:7204389-7207714</i>   |
|                                                                                                                                                                      |                                                                                 | <i>itb02g23980.t1</i> | <i>ItbSWEET8.1</i> | <i>Chr02:24313432-24315665</i> |
|                                                                                                                                                                      |                                                                                 | <i>itb05g25360.t1</i> | <i>ItbSWEET8.2</i> | <i>Chr05:29797696-29799315</i> |
| Group II :<br><i>AT1G21460.1/AtSWEET1</i><br><i>AT3G14770.1/AtSWEET2</i><br><i>AT5G53190.1/AtSWEET3</i>                                                              | <i>I. batatas</i>                                                               | <i>g42355</i>         | <i>IbSWEET1.1</i>  | <i>LG11:6571044-6572993</i>    |
|                                                                                                                                                                      |                                                                                 | <i>g45970</i>         | <i>IbSWEET2.1</i>  | <i>LG11:34025564-34028429</i>  |
|                                                                                                                                                                      |                                                                                 | <i>g37512</i>         | <i>IbSWEET2.2</i>  | <i>LG9:26404546-26407166</i>   |
|                                                                                                                                                                      |                                                                                 | <i>g37574</i>         | <i>IbSWEET2.3</i>  | <i>LG9:26774560-26778764</i>   |
|                                                                                                                                                                      |                                                                                 | <i>g20639</i>         | <i>IbSWEET3.1</i>  | <i>LG5:29266168-29267993</i>   |
|                                                                                                                                                                      | <i>I. trifida</i>                                                               | <i>itf01g30090.t1</i> | <i>ItfSWEET1.1</i> | <i>Chr01:28489958-28492016</i> |
|                                                                                                                                                                      |                                                                                 | <i>itf06g14370.t1</i> | <i>ItfSWEET1.2</i> | <i>Chr06:17600146-17603483</i> |
|                                                                                                                                                                      |                                                                                 | <i>itf05g11210.t1</i> | <i>ItfSWEET1.3</i> | <i>Chr05:13456959-13464258</i> |
|                                                                                                                                                                      |                                                                                 | <i>itf05g11180.t1</i> | <i>ItfSWEET1.4</i> | <i>Chr05:13426791-13433075</i> |
|                                                                                                                                                                      |                                                                                 | <i>itf05g10340.t1</i> | <i>ItfSWEET1.5</i> | <i>Chr05:12171409-12175054</i> |
|                                                                                                                                                                      |                                                                                 | <i>itf05g11190.t1</i> | <i>ItfSWEET1.6</i> | <i>Chr05:13438573-13447544</i> |
|                                                                                                                                                                      |                                                                                 | <i>itf01g06490.t1</i> | <i>ItfSWEET2.1</i> | <i>Chr01:4604929-4607829</i>   |
|                                                                                                                                                                      | <i>I. triloba</i>                                                               | <i>itf12g25940.t1</i> | <i>ItfSWEET3.1</i> | <i>Chr12:23179604-23181318</i> |
|                                                                                                                                                                      |                                                                                 | <i>itb01g29890.t1</i> | <i>ItbSWEET1.1</i> | <i>Chr01:33995339-33997526</i> |
|                                                                                                                                                                      |                                                                                 | <i>itb06g12580.t1</i> | <i>ItbSWEET1.2</i> | <i>Chr06:17231093-17234294</i> |
|                                                                                                                                                                      |                                                                                 | <i>itb05g11560.t1</i> | <i>ItbSWEET1.3</i> | <i>Chr05:17666984-17675087</i> |
|                                                                                                                                                                      |                                                                                 | <i>itb05g11570.t1</i> | <i>ItbSWEET1.4</i> | <i>Chr05:17686534-17694593</i> |
|                                                                                                                                                                      |                                                                                 | <i>itb10g03630.t1</i> | <i>ItbSWEET2.1</i> | <i>Chr10:3402029-3404651</i>   |
|                                                                                                                                                                      |                                                                                 | <i>itb01g07080.t1</i> | <i>ItbSWEET2.2</i> | <i>Chr01:5276517-5279474</i>   |
|                                                                                                                                                                      |                                                                                 | <i>itb12g26330.t1</i> | <i>ItbSWEET3.1</i> | <i>Chr12:27293008-27295110</i> |
|                                                                                                                                                                      | <i>I. batatas</i>                                                               | <i>g41769</i>         | <i>IbSWEET9.1</i>  | <i>LG11:2589559-2591471</i>    |
|                                                                                                                                                                      |                                                                                 | <i>g49942</i>         | <i>IbSWEET9.2</i>  | <i>LG12:22929904-22934939</i>  |

|                      |                   |                |              |                         |
|----------------------|-------------------|----------------|--------------|-------------------------|
| Group III:           |                   |                |              |                         |
| AT2G39060.1/AtSWEET9 |                   | g33162         | IbSWEET9.3   | LG8:20422984-20425012   |
| AT5G50790.1/AtSWEET1 |                   | g6315          | IbSWEET10.1  | LG2:14785339-14787649   |
| 0                    |                   | g33248         | IbSWEET10.2  | LG8:21098280-21101488   |
| AT3G48740.1/AtSWEET1 |                   | g55355         | IbSWEET10.3  | LG13:29379559-29381410  |
| 1                    |                   | g38390         | IbSWEET10.4  | LG10:1596906-1599570    |
| AT5G23660.1/AtSWEET1 |                   | g14486         | IbSWEET10.5  | LG4:12551915-12555045   |
| 2                    |                   | g14649         | IbSWEET10.6  | LG4:13860424-13864255   |
| AT5G50800.1/AtSWEET1 |                   | g4174          | IbSWEET15.1  | LG1:30131225-30133233   |
| 3                    |                   | g39828         | IbSWEET15.2  | LG10:12111176-12114109  |
| AT4G25010.1/AtSWEET1 |                   | g13599         | IbSWEET15.3  | LG4:5491975-5493755     |
| 4                    |                   | g13600         | IbSWEET15.4  | LG4:5496388-5498305     |
| AT5G13170.1/AtSWEET  |                   | g13601         | IbSWEET15.5  | LG4:5501178-5502945     |
| 15                   |                   | g61464         | IbSWEET15.6  | LG15:10703749-10705343  |
|                      |                   | g61461         | IbSWEET15.7  | LG15:10669805-10675552  |
|                      | <i>I. trifida</i> | itf01g34820.t1 | ItfSWEET9.1  | Chr01:31439366-31444973 |
|                      |                   | itf11g15210.t1 | ItfSWEET9.2  | Chr11:11572968-11575147 |
|                      |                   | itf04g17080.t1 | ItfSWEET10.1 | Chr04:16136022-16138460 |
|                      |                   | itf11g18410.t1 | ItfSWEET10.2 | Chr11:15683610-15687029 |
|                      |                   | itf02g04770.t1 | ItfSWEET10.3 | Chr02:5937857-5939964   |
|                      |                   | itf08g02230.t1 | ItfSWEET10.4 | Chr08:1554537-1557236   |
|                      |                   | itf13g10090.t1 | ItfSWEET10.5 | Chr13:12482270-12485935 |
|                      |                   | itf13g17000.t2 | ItfSWEET15.1 | Chr13:19113650-19115066 |
|                      |                   | itf05g00920.t1 | ItfSWEET15.2 | Chr05:737228-739500     |
|                      |                   | itf08g10570.t1 | ItfSWEET15.3 | Chr08:8975012-8978094   |
|                      | <i>I. triloba</i> | itb01g34620.t1 | ItbSWEET9.1  | Chr01:37215717-37221099 |
|                      |                   | itb11g16570.t1 | ItbSWEET9.2  | Chr11:14815811-14817710 |
|                      |                   | itb04g18880.t1 | ItbSWEET10.1 | Chr04:22666706-22668974 |
|                      |                   | itb13g13530.t1 | ItbSWEET10.2 | Chr13:20041045-20044131 |
|                      |                   | itb08g02250.t1 | ItbSWEET10.3 | Chr08:1811788-1814606   |
|                      |                   | itb02g00080.t1 | ItbSWEET10.4 | Chr02:66527-68913       |
|                      |                   | itb11g20660.t1 | ItbSWEET10.5 | Chr11:21859398-21862619 |
|                      |                   | itb13g20410.t1 | ItbSWEET15.1 | Chr15:27222781-27224625 |
|                      |                   | itb08g11840.t1 | ItbSWEET15.2 | Chr08:11826103-11828754 |
|                      |                   | itb05g00340.t1 | ItbSWEET15.3 | Chr05:266867-269193     |
|                      | <i>I. batatas</i> |                |              |                         |
| Group IV:            |                   |                |              |                         |
| AT3G16690.1/AtSWEET1 | <i>I. trifida</i> | itf04g18250.t1 | ItfSWEET16.1 | Chr04:18378337-18384219 |
| 6                    |                   | itf15g13030.t1 | ItfSWEET16.2 | Chr15:9811883-9815347   |
| AT4G15920.1/AtSWEET1 |                   | itf15g13020.t1 | ItfSWEET16.3 | Chr15:9799924-9802933   |
| 7                    | <i>I. triloba</i> | itf15g13040.t1 | ItfSWEET16.4 | Chr15:9819185-9827065   |
|                      |                   | itb04g18030.t1 | ItbSWEET16.1 | Chr04:21289222-21296312 |
|                      |                   | itb15g13360.t1 | ItbSWEET16.2 | Chr15:11360246-11362622 |

**Table S2** The Responses of *IbSWEETs* to hormones.

| ID                 |           | ABA       | GA      | IAA       | MeJA    | SA        |
|--------------------|-----------|-----------|---------|-----------|---------|-----------|
| <i>IbSWEET1.1</i>  | Group II  | repressed | induced | repressed | induced | induced   |
| <i>IbSWEET2.1</i>  |           | induced   | induced | repressed | induced | repressed |
| <i>IbSWEET2.2</i>  |           | repressed | induced | repressed | induced | induced   |
| <i>IbSWEET2.3</i>  |           | induced   | induced | repressed | induced | induced   |
| <i>IbSWEET3.1</i>  |           | repressed | induced | repressed | induced | induced   |
| <i>IbSWEET6.1</i>  | Group I   | repressed | induced | repressed | induced | repressed |
| <i>IbSWEET6.2</i>  |           | repressed | induced | repressed | induced | repressed |
| <i>IbSWEET6.3</i>  |           | induced   | induced | repressed | induced | induced   |
| <i>IbSWEET8.1</i>  |           | repressed | induced | repressed | induced | induced   |
| <i>IbSWEET8.2</i>  |           | repressed | induced | repressed | induced | repressed |
| <i>IbSWEET8.3</i>  |           | repressed | induced | repressed | induced | repressed |
| <i>IbSWEET9.1</i>  | Group III | repressed | induced | repressed | induced | repressed |
| <i>IbSWEET9.2</i>  |           | repressed | induced | induced   | induced | repressed |
| <i>IbSWEET9.3</i>  |           | repressed | induced | repressed | induced | induced   |
| <i>IbSWEET10.1</i> |           | repressed | induced | repressed | induced | repressed |
| <i>IbSWEET10.2</i> |           | induced   | induced | repressed | induced | induced   |
| <i>IbSWEET10.3</i> |           | induced   | induced | repressed | induced | repressed |
| <i>IbSWEET10.4</i> |           | induced   | induced | repressed | induced | induced   |
| <i>IbSWEET10.5</i> |           | induced   | induced | induced   | induced | repressed |
| <i>IbSWEET10.6</i> |           | induced   | induced | repressed | induced | repressed |
| <i>IbSWEET15.1</i> |           | induced   | induced | repressed | induced | repressed |
| <i>IbSWEET15.2</i> |           | induced   | induced | induced   | induced | repressed |
| <i>IbSWEET15.3</i> |           | repressed | induced | repressed | induced | repressed |
| <i>IbSWEET15.4</i> |           | induced   | induced | repressed | induced | repressed |
| <i>IbSWEET15.5</i> |           | induced   | induced | repressed | induced | induced   |
| <i>IbSWEET15.6</i> |           | repressed | induced | repressed | induced | repressed |
| <i>IbSWEET15.7</i> |           | induced   | induced | repressed | induced | repressed |

**Table S3** The Responses of *ItfSWEETs* and *ItbSWEETs* to hormones.

| ID                  | Groups    | ABA       | GA3       | IAA       |
|---------------------|-----------|-----------|-----------|-----------|
| <i>ItfSWEET1.1</i>  | Group II  | repressed | induced   | repressed |
| <i>ItfSWEET1.2</i>  |           | repressed | induced   | repressed |
| <i>ItfSWEET1.3</i>  |           | -         | induced   | induced   |
| <i>ItfSWEET1.4</i>  |           | induced   | repressed | repressed |
| <i>ItfSWEET1.5</i>  |           | -         | -         | -         |
| <i>ItfSWEET1.6</i>  |           | induced   | repressed | repressed |
| <i>ItfSWEET2.1</i>  |           | induced   | induced   | -         |
| <i>ItfSWEET3.1</i>  |           | -         | repressed | induced   |
| <i>ItfSWEET7.1</i>  | Group I   | induced   | repressed | -         |
| <i>ItfSWEET7.2</i>  |           | induced   | induced   | -         |
| <i>ItfSWEET7.3</i>  |           | repressed | induced   | repressed |
| <i>ItfSWEET7.4</i>  |           | induced   | repressed | repressed |
| <i>ItfSWEET8.1</i>  |           | -         | -         | -         |
| <i>ItfSWEET9.1</i>  | Group III | -         | induced   | repressed |
| <i>ItfSWEET9.2</i>  |           | -         | repressed | repressed |
| <i>ItfSWEET10.1</i> |           | -         | -         | -         |
| <i>ItfSWEET10.2</i> |           | repressed | repressed | repressed |
| <i>ItfSWEET10.3</i> |           | induced   | repressed | repressed |
| <i>ItfSWEET10.4</i> |           | repressed | induced   | repressed |
| <i>ItfSWEET10.5</i> |           | induced   | induced   | repressed |
| <i>ItfSWEET15.1</i> |           | induced   | -         | induced   |
| <i>ItfSWEET15.2</i> |           | induced   | repressed | repressed |
| <i>ItfSWEET15.3</i> |           | repressed | -         | -         |
| <i>ItfSWEET16.1</i> | Group IV  | induced   | induced   | induced   |
| <i>ItfSWEET16.2</i> |           | -         | -         | -         |
| <i>ItfSWEET16.3</i> |           | -         | -         | -         |
| <i>ItfSWEET16.4</i> |           | -         | -         | -         |
| <i>ItbSWEET1.1</i>  | Group II  | induced   | induced   | induced   |
| <i>ItbSWEET1.2</i>  |           | repressed | repressed | repressed |
| <i>ItbSWEET1.3</i>  |           | -         | -         | repressed |
| <i>ItbSWEET1.4</i>  |           | -         | repressed | repressed |
| <i>ItbSWEET2.1</i>  |           | repressed | repressed | induced   |
| <i>ItbSWEET2.2</i>  |           | induced   | repressed | repressed |
| <i>ItbSWEET3.1</i>  |           | repressed | induced   | repressed |
| <i>ItbSWEET5.1</i>  | Group I   | induced   | -         | repressed |
| <i>ItbSWEET6.1</i>  |           | induced   | induced   | -         |
| <i>ItbSWEET6.2</i>  |           | -         | -         | -         |
| <i>ItbSWEET6.3</i>  |           | -         | -         | -         |
| <i>ItbSWEET8.1</i>  |           | -         | induced   | induced   |
| <i>ItbSWEET8.2</i>  |           | -         | -         | -         |

|                     |           |           |           |           |
|---------------------|-----------|-----------|-----------|-----------|
| <i>ItbSWEET9.1</i>  |           | -         | -         | -         |
| <i>ItbSWEET9.2</i>  |           | repressed | repressed | repressed |
| <i>ItbSWEET10.1</i> |           | -         | -         | -         |
| <i>ItbSWEET10.2</i> |           | repressed | repressed | repressed |
| <i>ItbSWEET10.3</i> | Group III | repressed | induced   | repressed |
| <i>ItbSWEET10.4</i> |           | induced   | repressed | repressed |
| <i>ItbSWEET10.5</i> |           | repressed | -         | induced   |
| <i>ItbSWEET15.1</i> |           | repressed | induced   | induced   |
| <i>ItbSWEET15.2</i> |           | repressed | repressed | induced   |
| <i>ItbSWEET15.3</i> |           | induced   | induced   | induced   |
| <i>ItbSWEET16.1</i> | Group IV  | repressed | repressed | repressed |
| <i>ItbSWEET16.2</i> |           | repressed | induced   | induced   |

- indicates not found.



**Table S4.** Primers used in this study.

| <b>Gene</b>        | <b>Forward Primer</b>        | <b>Reverse Primer</b>        |
|--------------------|------------------------------|------------------------------|
| <i>IbSWEET1.1</i>  | TTTGGGTGTGGCTTAGGAGC         | GCCATCAACTCCGACCATCT         |
| <i>IbSWEET2.1</i>  | GCCATTTTACCTCTCGCTTGC        | CCGTTTGGGACGGAGATGAA         |
| <i>IbSWEET2.2</i>  | TTCCAGTTGGCATACTCACC         | CAAACACAGCGAAAACGCCT         |
| <i>IbSWEET2.3</i>  | CCAGTTGGCATACTCACCA          | CGAAAACGCCTAGCAACCAC         |
| <i>IbSWEET3.1</i>  | GTCGCCTCCGTGTCAATGTA         | TCAGCAGCCCATAAGCCATC         |
| <i>IbSWEET6.1</i>  | TTGTACGCAATCCCCAGTGT         | GGACGATGAGAGCAACCCTA         |
| <i>IbSWEET6.2</i>  | GAGGTTGTTTTCATGGCGGC         | AGTGCTACCAACAATGGCAGA        |
| <i>IbSWEET6.3</i>  | TGCTCGTTTGTGACTGGTGT         | TTGTGCCAATCCGGCTAGAG         |
| <i>IbSWEET8.1</i>  | GTTTCGTGTCTGGTTGTGTTT        | CCGCGCTCTTGCTCTTAATC         |
| <i>IbSWEET8.2</i>  | ATCCACACAGCGTTCTCGTC         | GAGCAAACCCGCCATTTTCC         |
| <i>IbSWEET8.3</i>  | GACCATCAAACTCTCGGCA          | TTCCCCGAGTTTTGGCATT          |
| <i>IbSWEET9.1</i>  | GTTTCATGCCGCTCACTCTCT        | AACGATTTGGGCGATTCCGA         |
| <i>IbSWEET9.2</i>  | TGCAACCAAACAGGCCAAGA         | TAACTCGCCTCTCACCCCTC         |
| <i>IbSWEET9.3</i>  | GTCGTCTGGCTTCTCTACGG         | CTGCCGTTTTCCGGTCTCTA         |
| <i>IbSWEET10.1</i> | CCTCAAGCCGAGCCCATATT         | TGCCTCACAATGCACAATGG         |
| <i>IbSWEET10.2</i> | TTCTGGGCTTCATCTTCGGG         | TGCTCCTTCACTGCGTCTTT         |
| <i>IbSWEET10.3</i> | AGTCCAACGCCACACTTCTC         | CGCCGAAACCAACAATCACC         |
| <i>IbSWEET10.4</i> | GGCTGGTTTCTCTGGTCACT         | TGACTGGAACCCTTCTGTCTG        |
| <i>IbSWEET10.5</i> | TGGCTGCTTCATCGAAACCT         | ATACCGACGCCCCAAGTAAC         |
| <i>IbSWEET10.6</i> | CCCAGTTTCTGTTCAAAGGCG        | TGGAGCCACAAATACGCACA         |
| <i>IbSWEET15.1</i> | CGCTCCTCTTCTCATCACCA         | AGAGTAGAGCCCTCCGACAA         |
| <i>IbSWEET15.2</i> | GCAACCCCCGAATAACCTCA         | CTCTTCGCGCACTAAAACCG         |
| <i>IbSWEET15.3</i> | GCGAACAAGCGAGGAATCA          | AGGGAGAACGCCACACAAAT         |
| <i>IbSWEET15.4</i> | ACGCATCAAAGAAAGCGAGG         | GCGAATGCCACACAAATCCA         |
| <i>IbSWEET15.5</i> | GCATCAAGTAAAGCAAGGCGT        | TGCTCCCGAGAAAGGAAACC         |
| <i>IbSWEET15.6</i> | TTTTCGCGGCTCATGGTTTC         | AGCACTATGCCAATCGGTGA         |
| <i>IbSWEET15.7</i> | TAGGAGTGTGGAGTTCTTGTC        | TCGAACCACTCCCATCATCC         |
| <i>Ibactin</i>     | AGCAGCATGAAGATTAAGGTTGTAGCAC | TGGAATAATAGAAGCACTTCCTGTGAAC |
